# Supplementary material for: Longitudinal Analysis of the Microbiome and Metabolome in the 5xfAD Mouse Model of Alzheimer’s Disease
Source: PubMed Central journal article supplement (PMC9765021; doi:10.1128/mbio.01794-22), 2022-12-05

**a. 18 month only, RF by sample type**

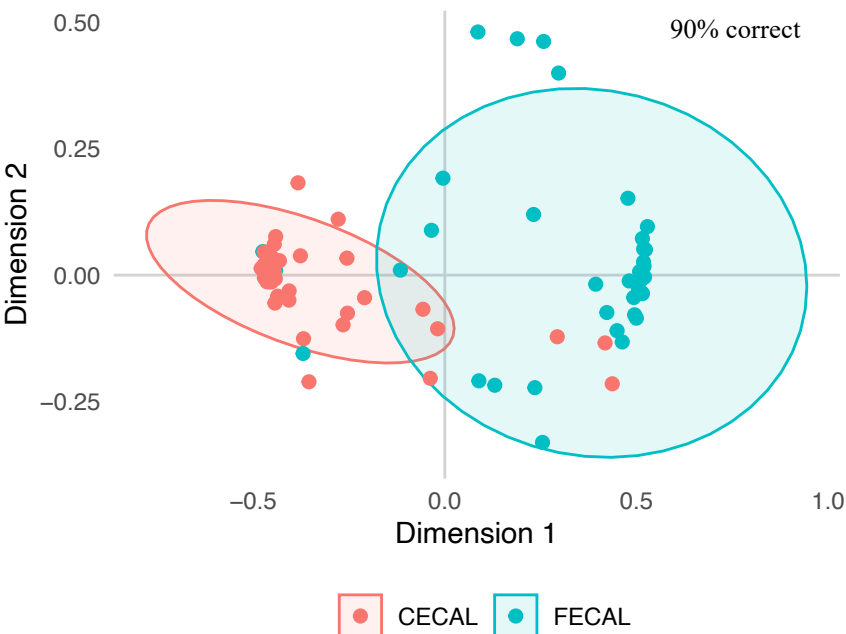

**b.**

Oscillibacter.sp..PEA192  
 Flavonifractor.plautii  
 Desulfovibrio.desulfuricans  
 Intestinimonas.butyrificiproducens  
 Dysosmobacter.welbionis  
 Clostridiales.bacterium  
 Christensenella.minuta  
 Fretibacterium.fastidiosum  
 Flintibacter.sp..KGMB00164  
 Clostridiales.bacterium.CCNA10  
 Desulfovibrio.vulgaris  
 Oscillibacter.valericigenes  
 Olsenella.sp..GAM18  
 Christensenella.sp..Marseille.P3954  
 Desulfovibrio.piger  
 Massilibactercora.timonensis  
 Sodaliphilus.pleomorphus  
 Collinsella.aerofaciens  
 Eubacterium.callanderi  
 Olsenella.timonensis

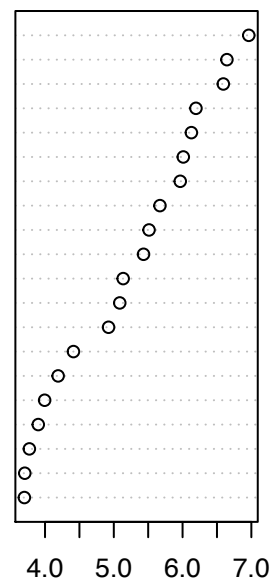

**c. 18 month only, RF by sex**

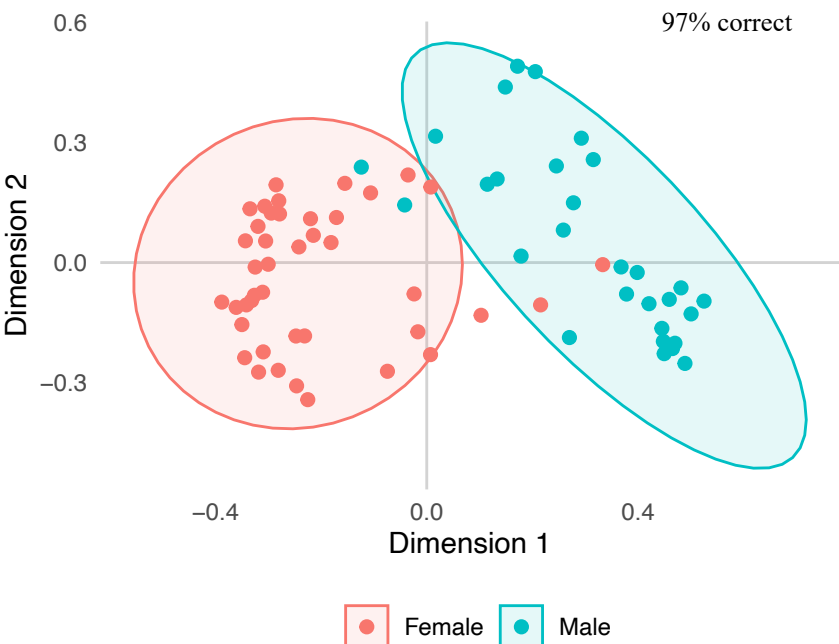

**d.**

Limosilactobacillus.reuteri  
 Lactobacillus.johnsonii  
 Lactobacillus.paragasseri  
 Lactobacillus.acidophilus  
 Turicibacter.sp..H121  
 uncultured.bacterium.BAC25G1  
 Adlercreutzia.equolifaciens  
 Lactobacillus.gasseri  
 Clostridium.botulinum  
 Arabia.massiliensis  
 Bacteroides.intestinalis  
 Parabacteroides.distasonis  
 Clostridium.beijerinckii  
 Limosilactobacillus.fermentum  
 Prevotella.oris  
 Odoribacter.splanchnicus  
 Eubacterium.maltosivorans  
 Parabacteroides.sp..CT06  
 Prevotella.ruminicola  
 Prevotella.enoea

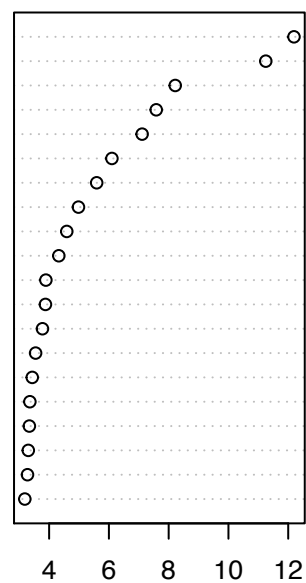

**e. All ages; RF by age**

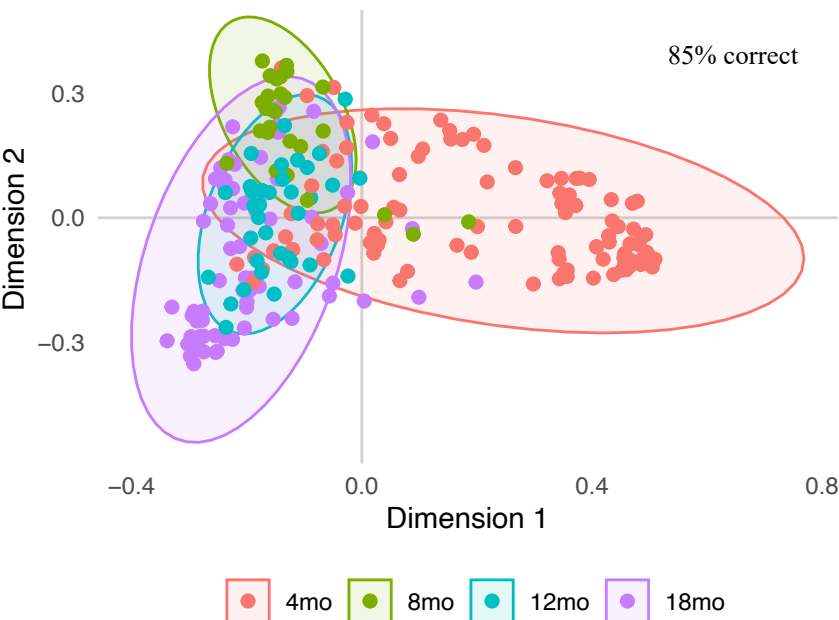

**f.**

Staphylococcus.nepalensis  
 Tannerella.sp..oral.taxon.HOT.286  
 Barnesiella.viscericola  
 uncultured.Muribaculum.sp.  
 Bifidobacterium.pseudolongum  
 Escherichia.coli  
 Hymenobacter.sedentarius  
 Pontibacter.russatus  
 Staphylococcus.xylosus  
 Faecalibaculum.rodentium  
 Hymenobacter.sp..PAMC.26628  
 Lactobacillus.johnsonii  
 Duncaniella.dubosii  
 uncultured.bacterium.BAC25G1  
 Adlercreutzia.equolifaciens  
 Bacteroides.thetaiotaomicron  
 Parabacteroides.sp..CT06  
 Gordonibacter.urolithifaciens  
 uncultured.Bacteroides.sp.  
 Bifidobacterium.animalis

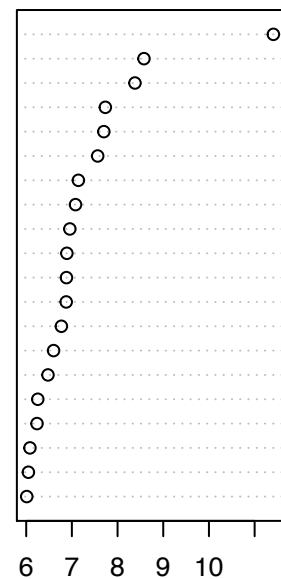

Supplement: mbio.01794-22-s0003.pdf [file mbio.01794-22-s0003.pdf]
