# Supplementary material for: Longitudinal Analysis of the Microbiome and Metabolome in the 5xfAD Mouse Model of Alzheimer’s Disease
Source: PubMed Central journal article supplement (PMC9765021; doi:10.1128/mbio.01794-22), 2022-12-05
Supplement: mbio.01794-22-s0001.pdf [file mbio.01794-22-s0001.pdf]

| PERMANOVA Statistics Corresponding to Main Text Figure 3g |     |           |         |         |       |        |     |
|-----------------------------------------------------------|-----|-----------|---------|---------|-------|--------|-----|
| CECAL                                                     |     |           |         |         |       |        |     |
|                                                           | Df  | SumsOfSqs | MeanSqs | F.Model | R2    | Pr(>F) |     |
| Genotype                                                  | 1   | 0.1314    | 0.13142 | 6.027   | 2.3%  | 0.001  | *** |
| Sex                                                       | 1   | 0.2619    | 0.26192 | 12.012  | 4.6%  | 0.001  | *** |
| Cohort                                                    | 1   | 0.9925    | 0.99254 | 45.517  | 17%   | 0.001  | *** |
| Cage                                                      | 21  | 3.4078    | 0.16228 | 7.442   | 60%   | 0.001  | *** |
| Residuals                                                 | 41  | 0.894     | 0.02181 |         | 16%   |        |     |
| Total                                                     | 65  | 5.6878    |         |         | 100%  |        |     |
| FECAL                                                     |     |           |         |         |       |        |     |
|                                                           | Df  | SumsOfSqs | MeanSqs | F.Model | R2    | Pr(>F) |     |
| Genotype                                                  | 1   | 0.0782    | 0.07823 | 2.489   | 0.39% | 0.027  | *   |
| Sex                                                       | 1   | 0.5058    | 0.50583 | 16.09   | 2.5%  | 0.001  | *** |
| Cohort                                                    | 3   | 3.3976    | 1.13253 | 36.025  | 17%   | 0.001  | *** |
| Cage                                                      | 51  | 12.5791   | 0.24665 | 7.846   | 63%   | 0.001  | *** |
| Residuals                                                 | 113 | 3.5524    | 0.03144 |         | 18%   |        |     |
| Total                                                     | 169 | 20.1132   |         |         | 100%  |        |     |
| Both Cecal & Fecal                                        |     |           |         |         |       |        |     |
|                                                           | Df  | SumsOfSqs | MeanSqs | F.Model | R2    | Pr(>F) |     |
| Genotype                                                  | 1   | 0.1614    | 0.16139 | 5.667   | 0.60% | 0.001  | **  |
| Sex                                                       | 1   | 0.7444    | 0.74441 | 26.14   | 2.7%  | 0.001  | *** |
| Type                                                      | 1   | 1.2861    | 1.28607 | 45.16   | 4.7%  | 0.001  | *** |
| Cohort                                                    | 3   | 4.3819    | 1.46063 | 51.29   | 16%   | 0.001  | *** |
| Cage                                                      | 51  | 15.4449   | 0.30284 | 10.634  | 57%   | 0.001  | *** |
| Residuals                                                 | 178 | 5.069     | 0.02848 |         | 19%   |        |     |
| Total                                                     | 235 | 27.0877   |         |         | 100%  |        |     |

| PERMANOVA Statistics Corresponding to Main Text Figure 3h |    |           |          |         |       |        |     |
|-----------------------------------------------------------|----|-----------|----------|---------|-------|--------|-----|
| CECAL                                                     |    |           |          |         |       |        |     |
| 4 mo only                                                 |    |           |          |         |       |        |     |
|                                                           | Df | SumsOfSqs | MeanSqs  | F.Model | R2    | Pr(>F) |     |
| Genotype                                                  | 1  | 0.01749   | 0.01749  | 1.1621  | 0.89% | 0.343  |     |
| Sex                                                       | 1  | 0.42283   | 0.42283  | 28.0974 | 21%   | 0.001  | *** |
| Housing.ID                                                | 8  | 1.2319    | 0.15399  | 10.2326 | 62%   | 0.001  | *** |
| Residuals                                                 | 20 | 0.30098   | 0.01505  |         | 15%   |        |     |
| Total                                                     | 30 | 1.97319   |          |         | 100%  |        |     |
| 18 mo only                                                |    |           |          |         |       |        |     |
|                                                           | Df | SumsOfSqs | MeanSqs  | F.Model | R2    | Pr(>F) |     |
| Genotype                                                  | 1  | 0.24614   | 0.24614  | 9.8614  | 9.0%  | 0.001  | *** |
| Sex                                                       | 1  | 0.13137   | 0.13137  | 5.2631  | 4.8%  | 0.004  | **  |
| Housing.ID                                                | 12 | 1.84744   | 0.15395  | 6.168   | 68%   | 0.001  | *** |
| Residuals                                                 | 20 | 0.4992    | 0.02496  |         | 18%   |        |     |
| Total                                                     | 34 | 2.72415   |          |         | 100%  |        |     |
| FECAL                                                     |    |           |          |         |       |        |     |
| 4 mo only                                                 |    |           |          |         |       |        |     |
|                                                           | Df | SumsOfSqs | MeanSqs  | F.Model | R2    | Pr(>F) |     |
| Genotype                                                  | 1  | 0.0276    | 0.02761  | 0.986   | 0.30% | 0.393  |     |
| Sex                                                       | 1  | 0.3926    | 0.39256  | 14.02   | 4.2%  | 0.001  | *** |
| Housing.ID                                                | 21 | 7.6169    | 0.36271  | 12.954  | 81%   | 0.001  | *** |
| Residuals                                                 | 47 | 1.316     | 0.028    |         | 14%   |        |     |
| Total                                                     | 70 | 9.353     |          |         | 100%  |        |     |
| 8 mo only                                                 |    |           |          |         |       |        |     |
|                                                           | Df | SumsOfSqs | MeanSqs  | F.Model | R2    | Pr(>F) |     |
| Genotype                                                  | 1  | 0.2061    | 0.206108 | 5.6352  | 2.9%  | 0.003  | **  |
| Sex                                                       | 1  | 0.2705    | 0.270503 | 7.3958  | 3.8%  | 0.001  | *** |
| Housing.ID                                                | 23 | 5.2563    | 0.228533 | 6.2483  | 74%   | 0.001  | *** |
| Residuals                                                 | 37 | 1.3533    | 0.036575 |         | 19%   |        |     |
| Total                                                     | 62 | 7.0862    |          |         | 100%  |        |     |
| 12 mo only                                                |    |           |          |         |       |        |     |
|                                                           | Df | SumsOfSqs | MeanSqs  | F.Model | R2    | Pr(>F) |     |
| Genotype                                                  | 1  | 0.07202   | 0.072017 | 2.8352  | 3.8%  | 0.007  | **  |
| Sex                                                       | 1  | 0.12227   | 0.122271 | 4.8136  | 6.5%  | 0.001  | *** |
| Housing.ID                                                | 6  | 1.00207   | 0.167011 | 6.5749  | 53%   | 0.001  | *** |
| Residuals                                                 | 27 | 0.68583   | 0.025401 |         | 36%   |        |     |
| Total                                                     | 35 | 1.88219   |          |         | 100%  |        |     |
| 18 mo only                                                |    |           |          |         |       |        |     |
|                                                           | Df | SumsOfSqs | MeanSqs  | F.Model | R2    | Pr(>F) |     |
| Genotype                                                  | 1  | 0.3393    | 0.33929  | 8.5487  | 8.3%  | 0.001  | *** |
| Sex                                                       | 1  | 0.2236    | 0.22362  | 5.6341  | 5.5%  | 0.001  | *** |
| Housing.ID                                                | 12 | 2.6937    | 0.22447  | 5.6557  | 66%   | 0.001  | *** |
| Residuals                                                 | 21 | 0.8335    | 0.03969  |         | 20%   |        |     |
| Total                                                     | 35 | 4.0901    |          |         | 100%  |        |     |
