# Supplementary material for: Longitudinal Analysis of the Microbiome and Metabolome in the 5xfAD Mouse Model of Alzheimer’s Disease
Source: PubMed Central journal article supplement (PMC9765021; doi:10.1128/mbio.01794-22), 2022-12-05
Supplement: mbio.01794-22-s0002.pdf [file mbio.01794-22-s0002.pdf]

**a. Shannon Diversity: Cecal samples only**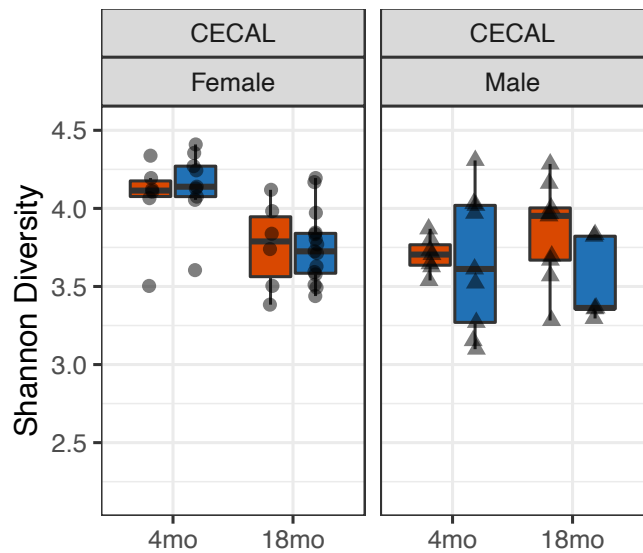**b. Shannon Diversity: Fecal samples only**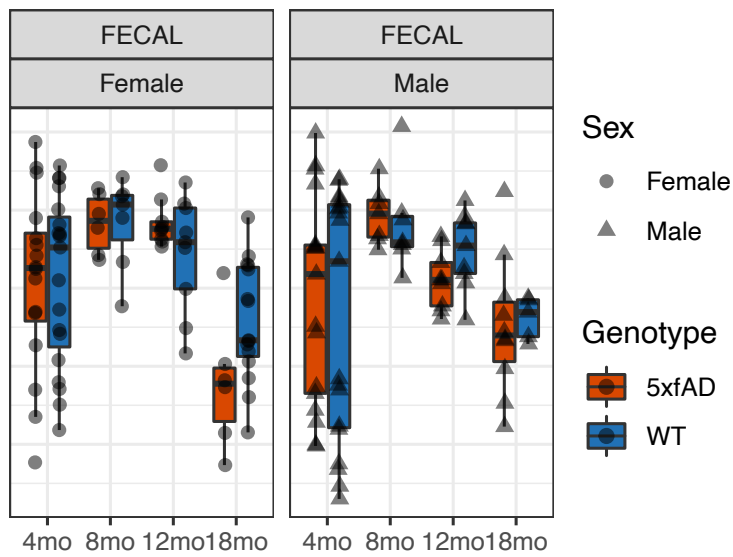

Sex

- Female
- ▲ Male

Genotype

- 5xfAD
- WT

**c. PCoA: Female Cecal Samples**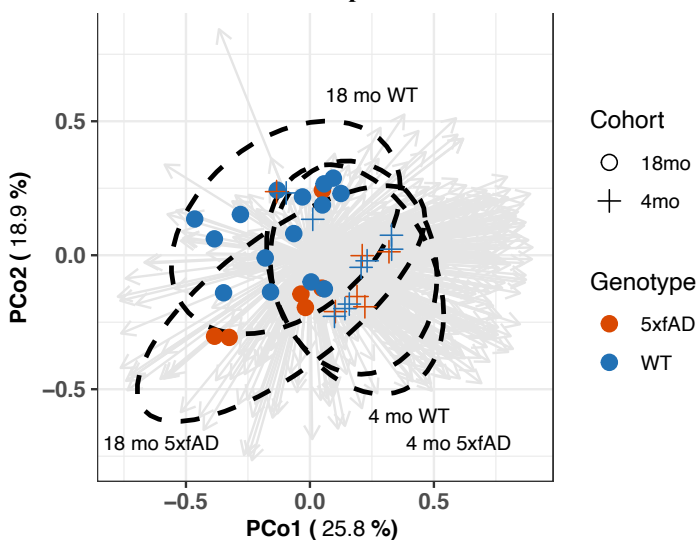**d. PCoA: Female Fecal Samples**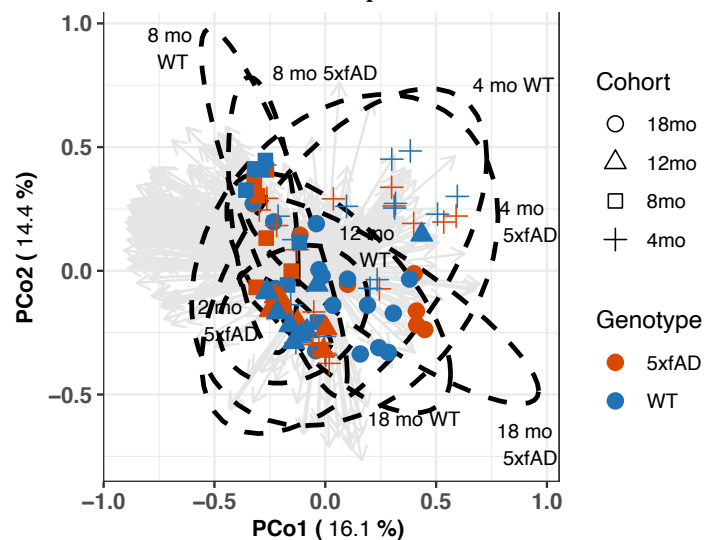

Cohort

- 18mo
- △ 12mo
- 8mo
- ⊕ 4mo

Genotype

- 5xfAD
- WT

**e. PCoA: Male Cecal Samples**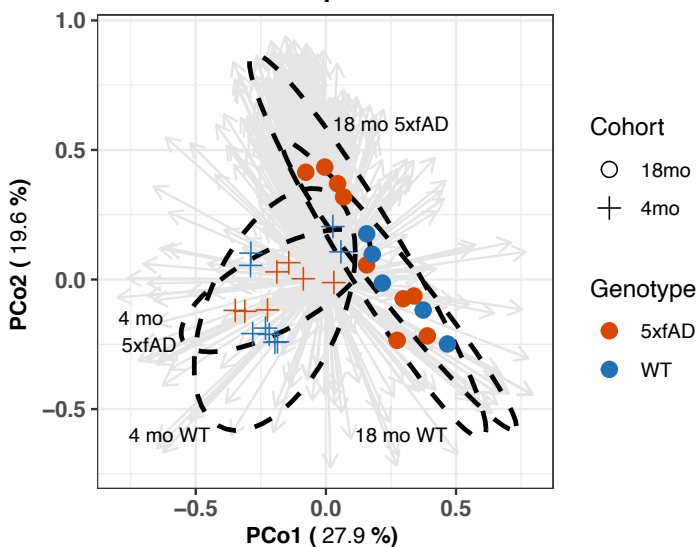**f. PCoA: Male Fecal Samples**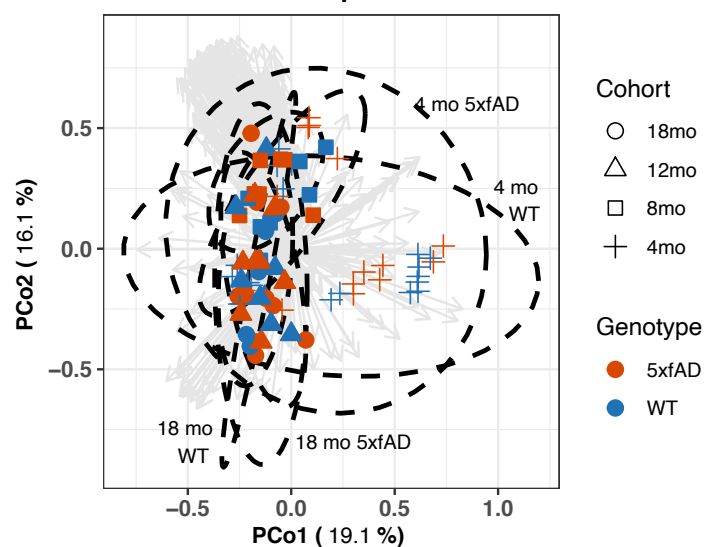

Cohort

- 18mo
- △ 12mo
- 8mo
- ⊕ 4mo

Genotype

- 5xfAD
- WT
