# Supplementary material for: Longitudinal Analysis of the Microbiome and Metabolome in the 5xfAD Mouse Model of Alzheimer’s Disease
Source: PubMed Central journal article supplement (PMC9765021; doi:10.1128/mbio.01794-22), 2022-12-05
Supplement: mbio.01794-22-s0005.pdf [file mbio.01794-22-s0005.pdf]

a. Total Validated Metabolite Concentration

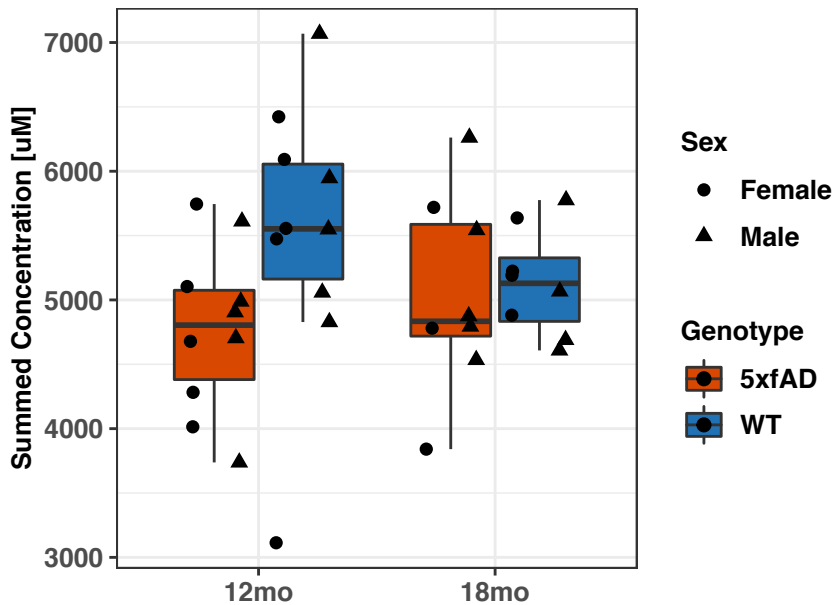

b. Shannon Diversity

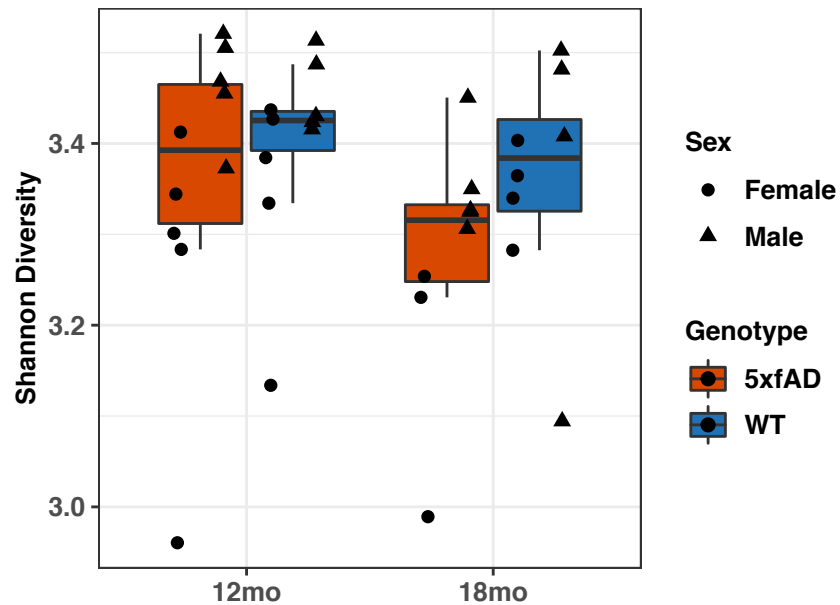

c. PCOA

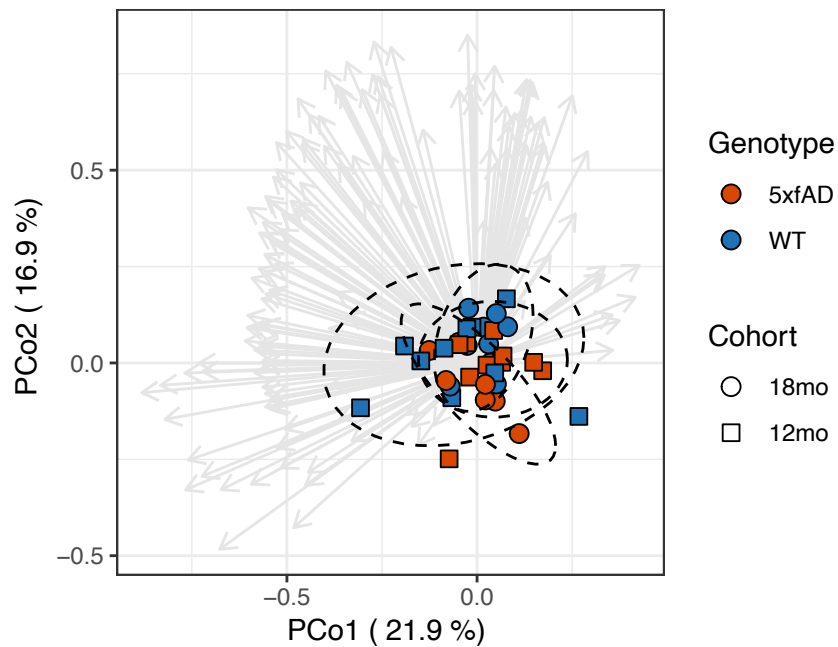

d. PERMANOVA

|            | Df | SumsOfSqs | MeanSqs  | F.Model | R2      | Pr(>F) |
|------------|----|-----------|----------|---------|---------|--------|
| Genotype   | 1  | 0.2769    | 0.027690 | 1.90211 | 0.04891 | 0.104  |
| Sex        | 1  | 0.03924   | 0.039241 | 2.69553 | 0.06931 | 0.037  |
| Age        | 1  | 0.01423   | 0.014235 | 0.97782 | 0.02514 | 0.396  |
| Housing ID | 14 | 0.22293   | 0.015924 | 1.09382 | 0.39377 | 0.357  |
| Residuals  | 18 | 0.26204   | 0.014558 |         | 0.46286 |        |
| Total      | 35 | 0.56614   |          |         | 1.00000 |        |
