# Supplementary material for: Longitudinal Analysis of the Microbiome and Metabolome in the 5xfAD Mouse Model of Alzheimer’s Disease
Source: PubMed Central journal article supplement (PMC9765021; doi:10.1128/mbio.01794-22), 2022-12-05

**a. 12 and 18 month, by age**

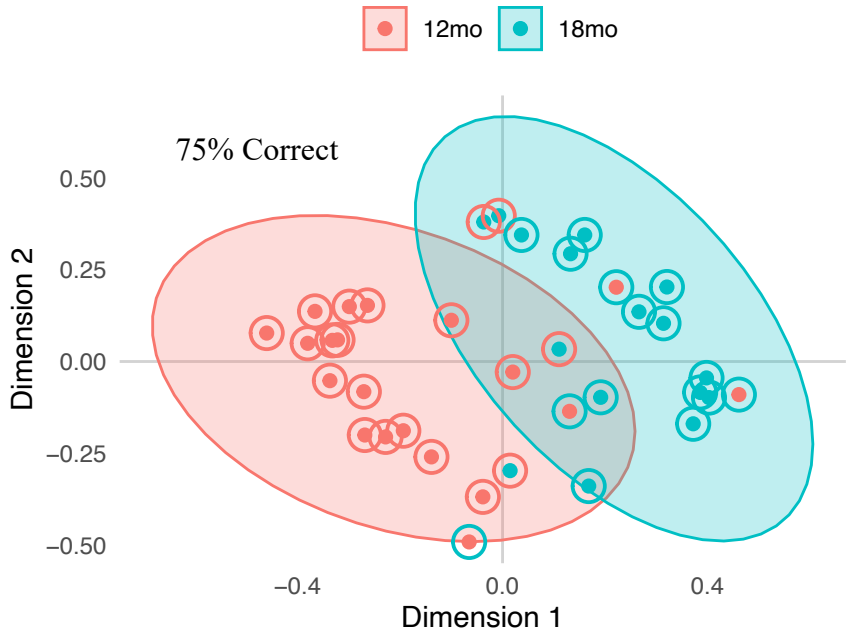

- Serotonin
- Spermidine
- Spermine
- SDMA
- PC.aa.C36.0
- C3
- Cit
- Asp
- Trp
- alpha.AAA
- PC.ae.C32.2
- C3.DC..C4.OH.
- PC.aa.C32.0
- SM.C20.2
- PC.aa.C38.3
- PC.ae.C44.4
- PC.ae.C44.6
- ADMA
- PC.aa.C40.6
- PC.ae.C42.3

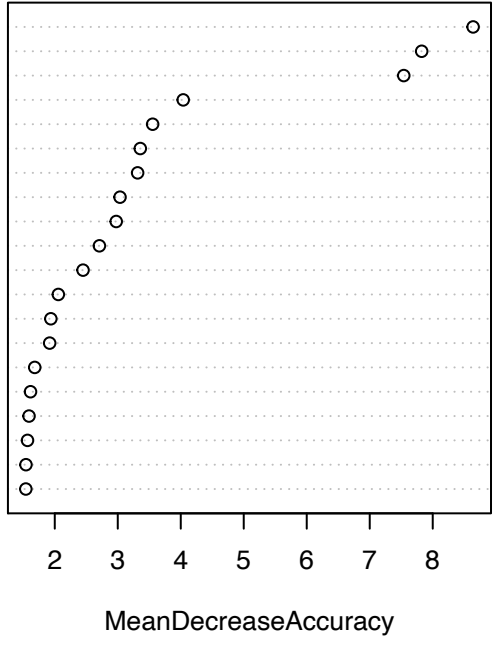

**b. 12 and 18 month, by sex**

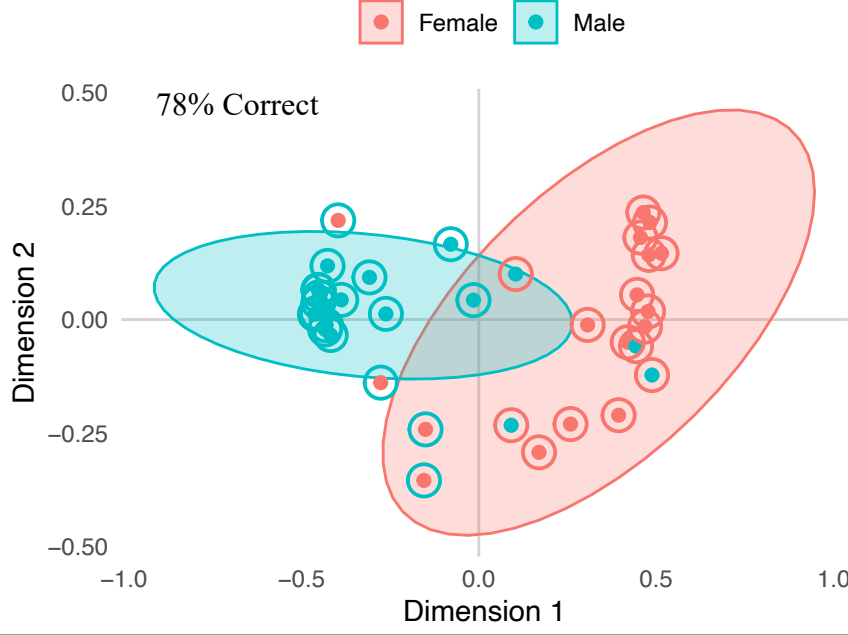

- SM.C20.2
- PC.ae.C34.2
- PC.aa.C34.3
- PC.ae.C42.0
- PC.aa.C42.6
- PC.aa.C40.3
- SM..OH..C22.2
- SM.C26.1
- PC.ae.C36.3
- PC.aa.C34.4
- PC.ae.C34.3
- PC.ae.C36.2
- PC.aa.C40.4
- lysoPC.a.C16.1
- Trp
- PC.aa.C40.2
- PC.aa.C32.3
- PC.aa.C36.3
- SM..OH..C24.1
- PC.aa.C42.2

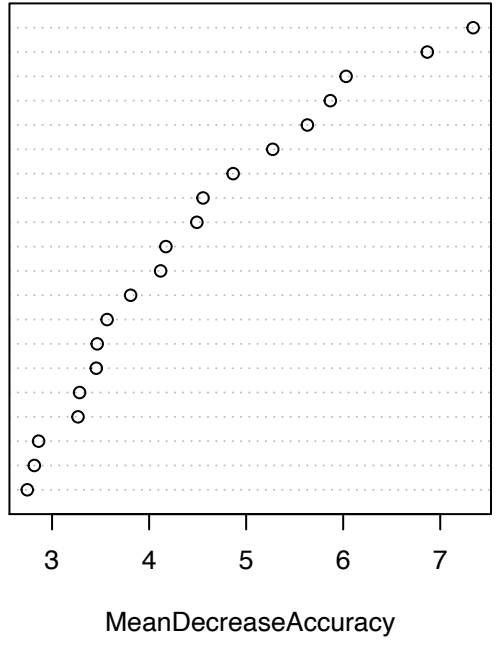

**c. 18 month, by genotype**

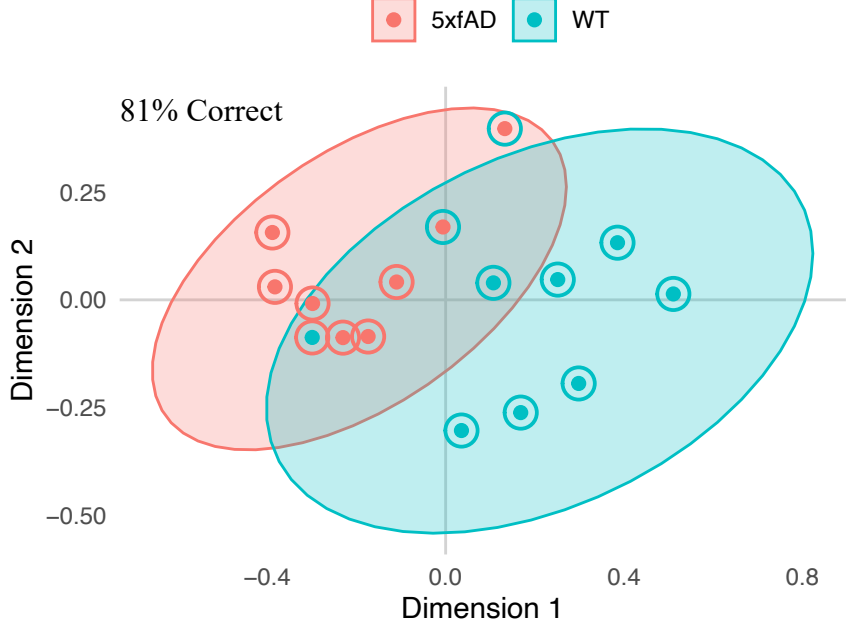

- Gly
- Carnosine
- Ser
- SM.C24.1
- Serotonin
- SM..OH..C14.1
- C14.1
- lysoPC.a.C18.1
- C18.1
- lysoPC.a.C17.0
- lysoPC.a.C16.1
- SDMA
- SM.C24.0
- Tyr
- Asn
- SM..OH..C22.1
- SM.C16.0
- PC.aa.C38.4
- PC.ae.C40.2
- His

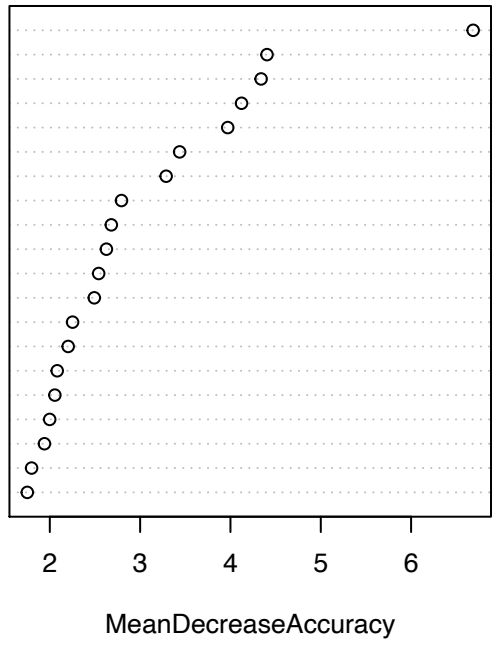

Supplement: mbio.01794-22-s0006.pdf [file mbio.01794-22-s0006.pdf]
