# Supplementary material for: Longitudinal Analysis of the Microbiome and Metabolome in the 5xfAD Mouse Model of Alzheimer’s Disease
Source: PubMed Central journal article supplement (PMC9765021; doi:10.1128/mbio.01794-22), 2022-12-05

a.

## 18 month samples by genotype

| Metabolite | padj   | 5xfAD vs WT    |
|------------|--------|----------------|
| Carnosine  | <0.005 | Lower in 5xfAD |

## 12 &amp; 18 month samples by genotype

| Metabolite      | padj  | 5xfAD vs WT    |
|-----------------|-------|----------------|
| Lyso PC a C18:1 | <0.05 | Lower in 5xfAD |
| Carnosine       | <0.05 | -              |

## 12 &amp; 18 month samples by age

| Metabolite    | padj   | 18 vs 12 mo    |
|---------------|--------|----------------|
| Serotonin     | <0.005 | Lower in 18 mo |
| Spermine      | <0.05  | Lower in 18 mo |
| Spermidine    | <0.05  | Lower in 18 mo |
| Glutamic acid | <0.05  | Lower in 18 mo |

## 12 &amp; 18 month samples by sex

| Metabolite    | padj   | F vs M      |
|---------------|--------|-------------|
| SM C20:2      | <0.005 | Lower in F  |
| PC ae C42:0   | <0.01  | Lower in F  |
| PC aa C34:3   | <0.05  | Lower in F  |
| PC aa C42:6   | <0.05  | Lower in F  |
| Lysine        | <0.05  | Lower in F  |
| SM (OH) C24:1 | <0.05  | Higher in F |
| PC aa C36:4   | <0.05  | Lower in F  |
| PC aa C36:5   | <0.05  | Lower in F  |
| PC ae C38:0   | <0.05  | Lower in F  |
| PC aa 36:3    | <0.05  | Lower in F  |
| PC aa 38:6    | <0.05  | Lower in F  |

b.

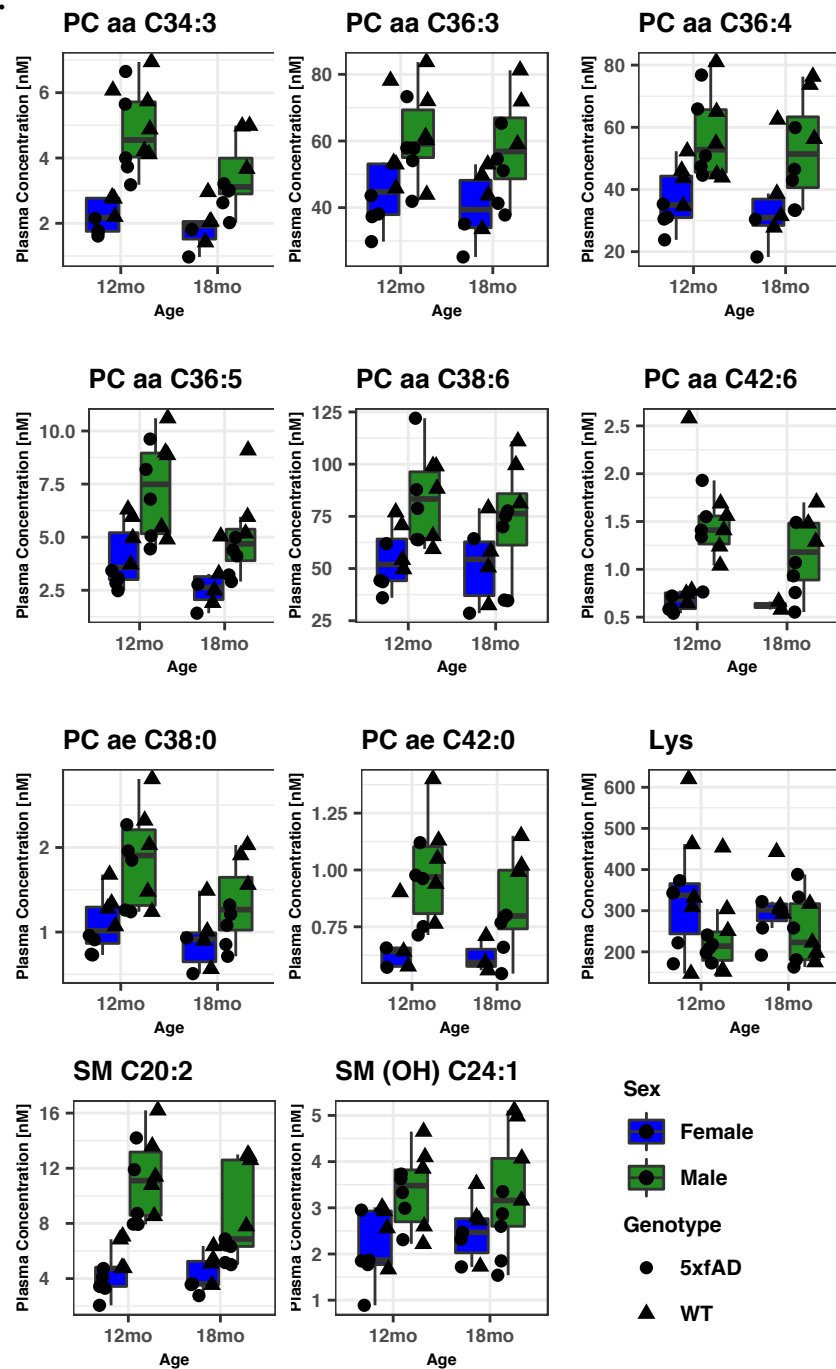

Supplement: mbio.01794-22-s0007.pdf [file mbio.01794-22-s0007.pdf]
