# Supplementary material for: Longitudinal Analysis of the Microbiome and Metabolome in the 5xfAD Mouse Model of Alzheimer’s Disease
Source: PubMed Central journal article supplement (PMC9765021; doi:10.1128/mbio.01794-22), 2022-12-05

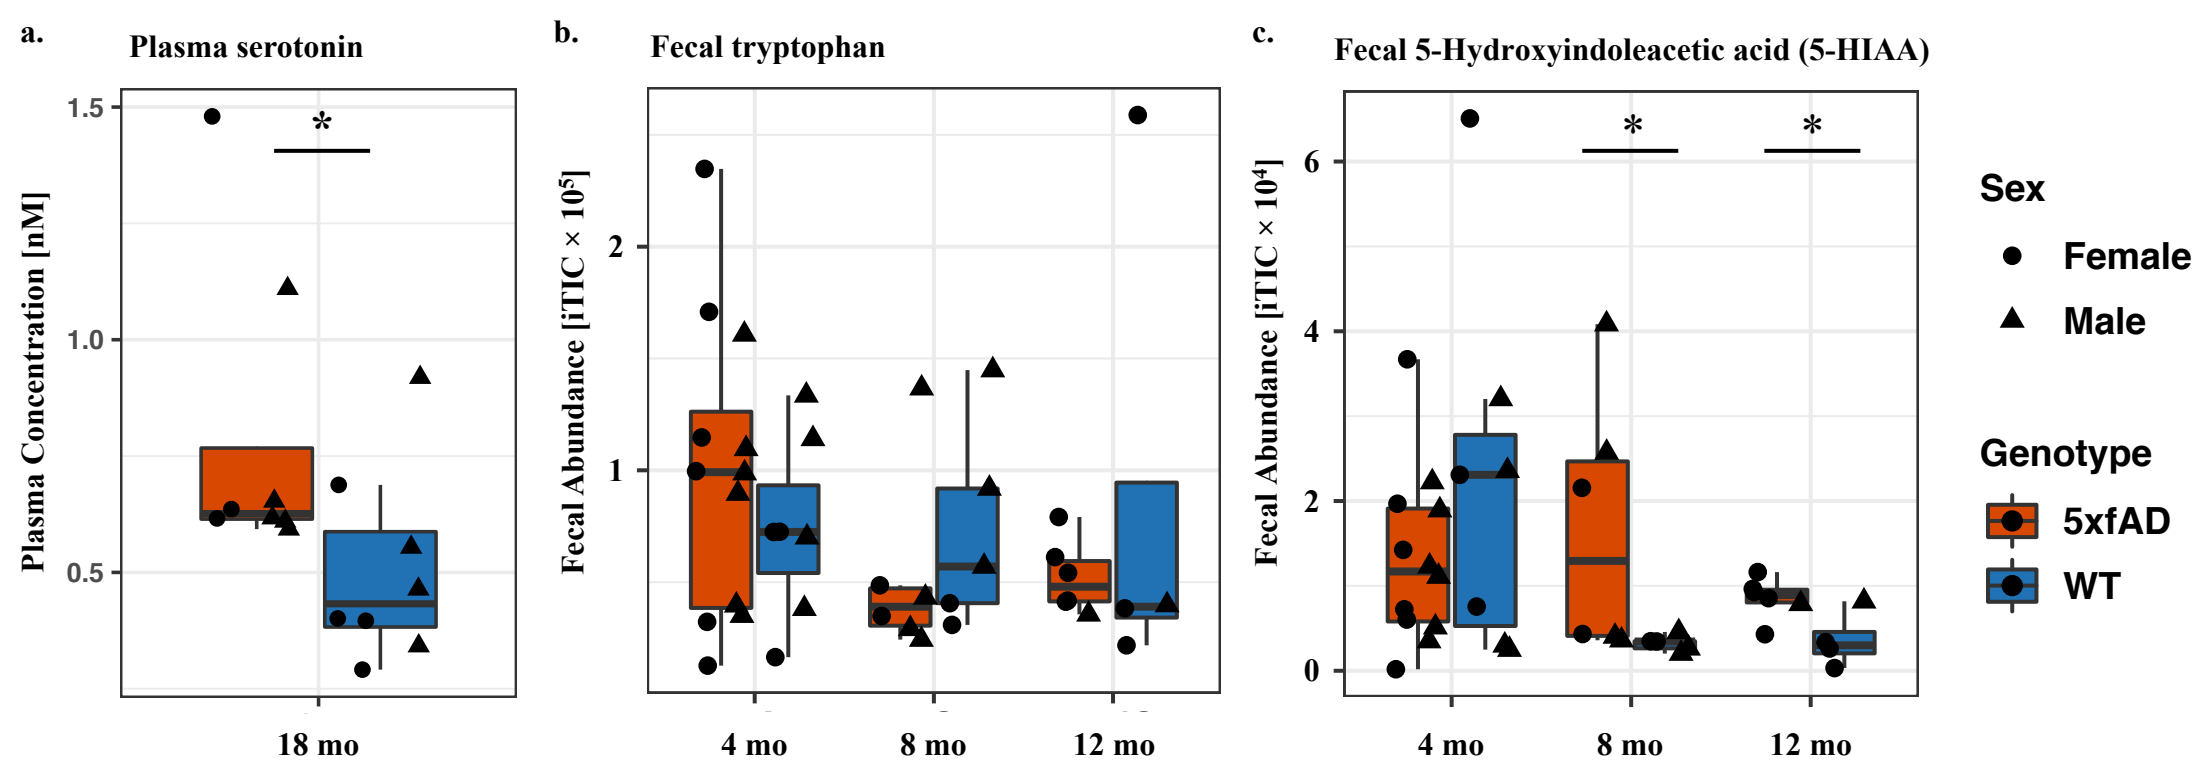

Supplement: mbio.01794-22-s0008.pdf [file mbio.01794-22-s0008.pdf]
